# Supplementary material for: Strategies for enhancing the photocurrent, photovoltage, and stability of photoelectrodes for photoelectrochemical water splitting
Source: Royal Society of Chemistry journal article supplement (doi:10.1039/c8cs00997j), 2019-01-01
Supplement: c8cs00997j1.pdf [file c8cs00997j1.pdf]

## Electronic Supplementary Information

### Strategies for Enhancing Photocurrent, Photovoltage, and Stability of Photoelectrodes for Photoelectrochemical Water Splitting

Wooseok Yang,<sup>a</sup> Rajiv Ramanujam Prabhakar,<sup>b</sup> Jeiwan Tan,<sup>a</sup> S. David Tilley,<sup>\*b</sup> and Jooho Moon<sup>\*a</sup>

<sup>a</sup> Department of Materials Science and Engineering, Yonsei University, 50 Yonsei-ro, Seodaemun-gu, Seoul, 03722, Republic of Korea  
E-mail: jmoon@yonsei.ac.kr

<sup>b</sup> Department of Chemistry, University of Zurich, 8057 Zurich, Switzerland  
E-mail: david.tilley@chem.uzh.ch

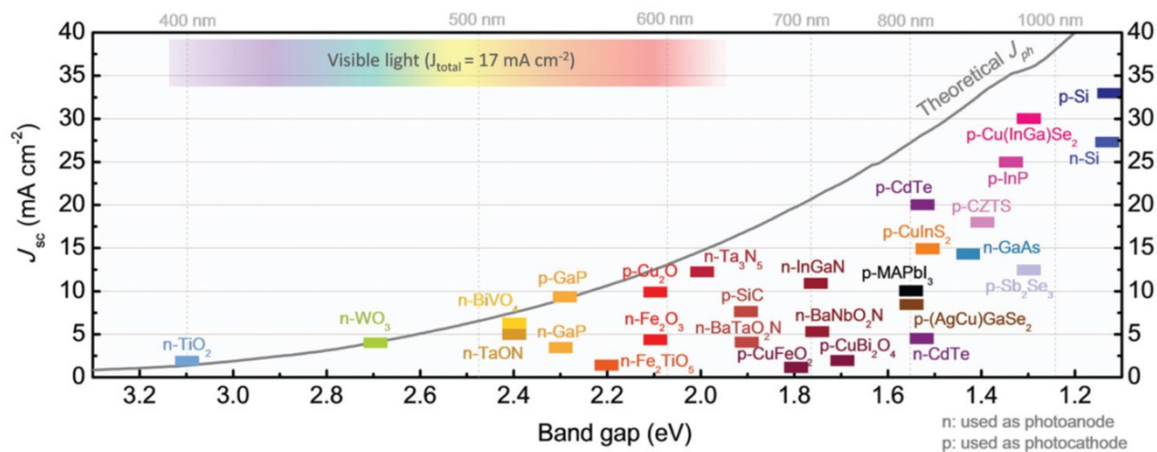

**Fig S1.** Reported photocurrent density under short circuit condition ( $J_{sc}$ ) of photoelectrodes for PEC water splitting under standard conditions: 1.0 sun, short circuit conditions of 1.23  $V_{RHE}$  for photoanode, and 0  $V_{RHE}$  for photocathode. Material taken from the report made by Kim and Lee et al.<sup>1</sup>

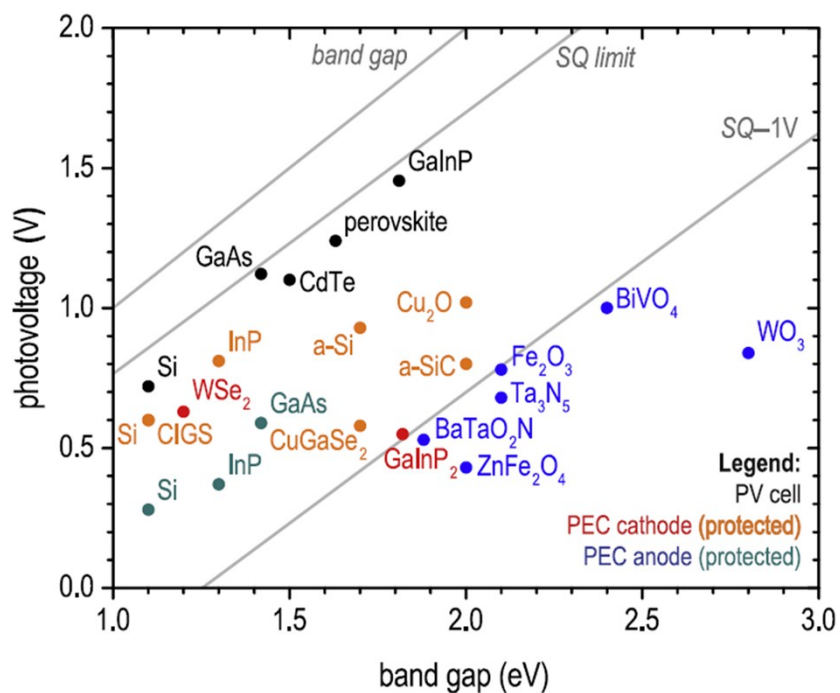

**Fig S2.** Photovoltage benchmarks for PEC and PV materials as functions of  $E_g$ , SQ limit, and SQ-1. Material taken from the report made by Mayer.<sup>2</sup>



## References

1. J. H. Kim, D. Hansora, P. Sharma, J.-W. Jang and J. S. Lee, *Chemical Society Reviews*, 2019, **48**, 1908-1971.
2. M. T. Mayer, *Current Opinion in Electrochemistry*, 2017, **2**, 104-110.
3. D. Bae, B. Seger, P. C. Vesborg, O. Hansen and I. Chorkendorff, *Chemical Society Reviews*, 2017, **46**, 1933-1954.
